# Supplementary material for: Predicting Hospitalization Costs for Pulmonary Tuberculosis Patients Based on Machine Learning
Source: Research Square preprint supplement (doi:10.21203/rs.3.rs-4186975/v1), 2024-04-04
Supplement: Supplementary file 1 [file 1a02bdaafaef73770624836e.docx]

Table 1 Basic information of patients with pulmonary tuberculosis

| Variable | Inpatient | | Hospitalization cost (Yuan) | | |
| --- | --- | --- | --- | --- | --- |
| Number of subjects (person-time) | Composition ratio (%) | *M* (*P25* , *P75*) | *Z*/*H* value | *P* value |
| Gender  Male  Female  Age (years)  ≤15  16-30  31-45  46-60  61-75  ≥76  Marital status  Unmarried  Married  Divorce  Widowed  Payment method  Corps Medical Insurance  Urban and rural residents  Urban Workers  Off-site health insurance  Self-pay  Admission condition  General  Emergency  Sick  Critical  Length of hospital stay (days)  ≤10  11-20  21-30  31-40  ≥41  Initial treatment  Yes  No  Presence of other diseases  Yes  No  Transfer  Yes  No  Allergy  Yes  No  Drug resistance  Yes  No  Admission department  ICU  Respiratory  Tuberculosis I  Tuberculosis II  Outpatient emergency department  Internal Division I  Internal Division II  Cardiology | 4425  5145  50  577  782  1758  4586  1817  498  8748  228  96  27  7756  1219  348  220  5083  2448  1182  857  2316  4787  1283  504  680  7609  1961  5912  3658  462  9108  143  9427  213  9357  442  1671  1332  825  589  1538  1639  1534 | 46.24  53.76  0.52  6.03  8.17  18.37  47.92  18.99  5.20  91.41  2.38  1.00  0.28  81.04  12.74  3.64  2.30  53.11  25.58  12.35  8.96  24.20  50.02  13.41  5.27  7.11  79.51  20.49  61.78  38.22  4.83  95.17  1.49  98.51  2.23  97.77  4.62  17.46  13.92  8.62  6.15  16.07  17.13  16.03 | 13012.71 (9668.82, 19609.62)  13284.21 (10066.49, 19733.87)  10194.28 (7125.30, 15014.94)  9981.99 (6803.84, 15703.38)  10975.33 (7891.00, 16115.45)  12548.56 (9528.83, 17919.80)  13990.43 (10627.84, 21314.23)  13463.17 (10411.41, 19538.85)  10306.86 (6776.75, 15785.45)  13261.20 (10037.95, 19735.77)  14083.54 (10633.55, 21107.92)  14453.72 (10523.80, 23956.15)  14506.26 (9521.99, 22024.80)  13448.13 (10151.61, 20408.62)  12260.32 (9205.85, 17218.68)  12127.39 (8830.54, 16792.04)  9676.71 (6819.64, 13290.25)  12737.53 (9727.38, 18372.96)  13894.13 (10376.44, 21635.34)  16056.53 (11402.74, 26732.78)  11227.71 (8288.83, 14816.97)  8534.42 (6581.87, 10867.26)  12737.45 (10620.33, 15273.81)  21806.43 (17403.86, 26554.09)  30719.36 (25863.00, 36136.04)  48813.73 (37608.93, 65533.00)  11851.97 (9173.40, 14936.82)  30531.42 (23572.72, 43639.10)  12447.76 (9492.16, 18281.68)  14503.09 (10751.23, 21035.02)  17735.98 (13010.11, 28358.99)  12978.66 (9778.39, 19239.64)  13647.12 (9661.46, 22477.21)  13146.25 (9892.78, 19618.11)  47359.01 (24594.49, 67134.57)  13023.42 (9822.66, 19081.58)  22044.65 (14815.62, 35472.80)  10405.34 (7723.47, 13916.47)  16126.22 (12032.04, 22693.79)  18176.32 (11875.56, 34979.83)  9889.17 (7853.47, 12614.11)  12975.58 (10015.79, 18010.73)  13000.31 (10434.01, 17895.37)  13301.91 (10587.58, 18674.75) | -2.213  340.37  107.152  151.295  313.071  5496.206  -60.977  -12.435  -11.472  -0.920  -17.598  1221.911 | < 0.05  < 0.001  < 0.001  < 0.001  < 0.001  < 0.001  < 0.001  < 0.001  < 0.001  > 0.05  < 0.001  < 0.001 |

Table 2 Composition of hospitalization costs for patients with pulmonary tuberculosis

| Cost Category | Total cost (ten thousand RMB) | Median cost [yuan, *M* (*Q* 1 , *Q* 3)] | Composition ratio (%) |
| --- | --- | --- | --- |
| Diagnostic cost | 3261.81 | 2550.30 (1647.15, 4300.03) | 19.34 |
| Medical service cost | 1291.87 | 800.00 (562.00, 1397.00) | 7.66 |
| Material cost | 5101.30 | 4209.74 (3444.53, 5728.59) | 30.25 |
| Treatment cost | 3057.79 | 2405.50 (1542.00, 3742.25) | 18.13 |
| Drug cost | 4047.92 | 2885.02 (1665.10, 4880.01) | 24.01 |
| Other cost | 101.59 | 7.00 (0.00, 56.00) | 0.60 |
| Total hospitalization cost | 16862.29 | 13150.45 (9891.34, 19648.48) | 100.00 |

Table 3 Multiple linear regression analysis results of influencing factors of hospitalization costs in patients with pulmonary tuberculosis

| Influencing factors | Regression Coefficient *β* | Standard Error | Standard regression coefficient | *t* value | *P* value | VIF |
| --- | --- | --- | --- | --- | --- | --- |
| Constant  Age *X*2  Marital status *X*3 (Ref: Unmarried)  Married  Divorce  Widowed  Admission condition *X*5  Length of stay *X*6  Initial treatment *X*7  Presence of other diseases *X*8  Transfer *X*9  Drug resistance *X*10  Admission department *X*11 (Ref: ICU)  Respiratory  Tuberculosis I  Tuberculosis II  Outpatient emergency department  Internal Division I  Internal Division II  Cardiology | 3.816  0.026  0.063  0.088  0.050  -0.005  0.160  0.131  0.010  0.036  0.047  -0.331  -0.264  -0.225  -0.323  -0.289  -0.272  -0.250 | 0.027  0.001  0.007  0.011  0.015  0.001  0.002  0.005  0.003  0.006  0.010  0.007  0.008  0.008  0.008  0.007  0.007  0.007 | 0.107  0.067  0.051  0.019  -0.018  0.657  0.200  0.019  0.029  0.026  -0.474  -0.345  -0.239  -0.293  -0.401  -0.386  -0.346 | 141.634  18.034  9.158  8.037  3.231  -3.419  86.069  27.741  2.971  5.598  4.782  -46.665  -33.847  -26.814  -38.857  -39.845  -37.695  -34.878 | ＜0.001  ＜0.001  ＜0.001  ＜0.001  0.001  0.001  ＜0.001  ＜0.001  0.003  ＜0.001  ＜0.001  ＜0.001  ＜0.001  ＜0.001  ＜0.001  ＜0.001  ＜0.001  ＜0.001 | 1. 411  2.127  1.590  1.332  1.046  2.320  2.062  1.584  1.099  1.178  4.115  4.150  3.166  2.266  4.029  4.190  3.392 |

Table 4 Feature selection in multiple regression models

| Cost Category | Age | Marital status | Admission condition | Length of hospital stay | Initial treatment | Presence of other diseases | Transfer | Drug resistance | Admission department |
| --- | --- | --- | --- | --- | --- | --- | --- | --- | --- |
| Diagnostic cost | √ |  | √ | √ | √ | √ | √ |  |  |
| Medical service cost | √ |  | √ | √ | √ |  |  |  | √ |
| Material cost | √ |  | √ | √ | √ |  | √ |  | √ |
| Treatment cost | √ | √ |  | √ |  | √ | √ | √ | √ |
| Drug cost | √ |  |  | √ | √ | √ | √ |  | √ |
| Other cost | √ | √ | √ | √ | √ |  | √ |  | √ |
| Total hospitalization cost | √ |  | √ | √ | √ |  | √ | √ | √ |

Table 5 Multiple regression and MLP model comparison results

| Cost Name | Multiple regression | | | | | | MLP | | | | | |
| --- | --- | --- | --- | --- | --- | --- | --- | --- | --- | --- | --- | --- |
| 2020-2021 (Training Set) | | | 2022 (Test Set) | | | 2020-2021 (Training Set) | | | 2022 (Test Set) | | |
| R2 | RMSE | MAE | R2 | RMSE | MAE | R2 | RMSE | MAE | R2 | RMSE | MAE |
| Diagnostic cost | 0.445 | 0.264 | 0.181 | 0.518 | 0.264 | 0.175 | 0.596 | 0.224 | 0.161 | 0.609 | 0.237 | 0.163 |
| Medical service cost | 0.716 | 0.176 | 0.121 | 0.753 | 0.181 | 0.125 | 0.826 | 0.138 | 0.093 | 0.816 | 0.156 | 0.107 |
| Material cost | 0.657 | 0.117 | 0.085 | 0.668 | 0.133 | 0.098 | 0.708 | 0.107 | 0.079 | 0.712 | 0.124 | 0.092 |
| Treatment cost | 0.527 | 0.302 | 0.201 | 0.564 | 0.270 | 0.187 | 0.698 | 0.241 | 0.158 | 0.629 | 0.249 | 0.162 |
| Drug cost | 0.463 | 0.300 | 0.218 | 0.540 | 0.296 | 0.220 | 0.585 | 0.263 | 0.197 | 0.581 | 0.282 | 0.212 |
| Other cost | 0.456 | 0.760 | 0.591 | 0.352 | 0.792 | 0.627 | 0.600 | 0.650 | 0.486 | 0.313 | 0.816 | 0.611 |
| Total hospitalization cost | 0.707 | 0.130 | 0.098 | 0.777 | 0.132 | 0.099 | 0.817 | 0.103 | 0.078 | 0.832 | 0.114 | 0.086 |
